# Supplementary material for: The Use of Sensors to Prevent, Predict Transition to Chronic and Personalize Treatment of Low Back Pain: A Systematic Review
Source: MDPI journal article supplement (doi:10.3390/s23187695), 2023-09-06
Supplement: s1 [file s1]

## Supplementary Materials:

### Scheme S1. Search strategies

- PubMed → (("Low back pain" [Mesh] OR LBP) AND (sensor OR sensors OR sensing OR inertial OR IMU OR IMUs OR accelerometer OR gyroscope OR goniom\* OR "body sensor network") AND (kinematic\* OR kinetic\* OR movement OR "physical activity" OR "sedentary behaviour" OR "heart rate" OR electromyography OR EMG))

- Medline → noft("Low Back Pain" OR LBP) AND noft(sensor OR sensors OR sensing OR inertial OR IMU OR IMUs OR accelerometer OR gyroscope OR goniom\* OR "body sensor network") AND noft(kinematic\* OR kinetic\* OR movement OR "physical activity" OR "sedentary behaviour" OR "heart rate" OR electromyography OR EMG) → filter (RCT OR Comparative Study OR Observational Study OR Clinical Trial OR Clinical Trial Protocol OR Controlled Clinical Trial)

- WOS → ((TS=("Low back pain" OR LBP)) AND TS=(sensor OR sensors OR sensing OR inertial OR IMU OR IMUS OR accelerometer OR gyroscope OR goniom\* OR "body sensor network") AND TS=(kinematic\* OR kinetic\* OR movement OR "physical activity" OR "sedentary behaviour" OR "heart rate" OR electromyography OR EMG)) → filter (article)

- Scopus → ( TITLE-ABS-KEY ( "Low back pain" OR lbp ) AND TITLE-ABS-KEY ( sensor OR sensors OR sensing OR inertial OR imu OR imus OR accelerometer OR gyroscope OR goniom\* OR "body sensor network" ) AND TITLE-ABS-KEY ( kinematic\* OR kinetic\* OR movement OR "physical activity" OR "sedentary behaviour" OR "heart rate" OR electromyography OR emg ) ) AND PUBYEAR > 2009 AND ( LIMIT-TO ( DOCTYPE , "ar" ) ) → filter (article)
